# Supplementary figures and images for: Attributes of placemaking matrix in Business improvement district
Source: Research Square preprint supplement (doi:10.21203/rs.3.rs-7568993/v1), 2025-11-05

Equation 1.Scores on axis (position of Strategy or quadrant with respect to AREA map)


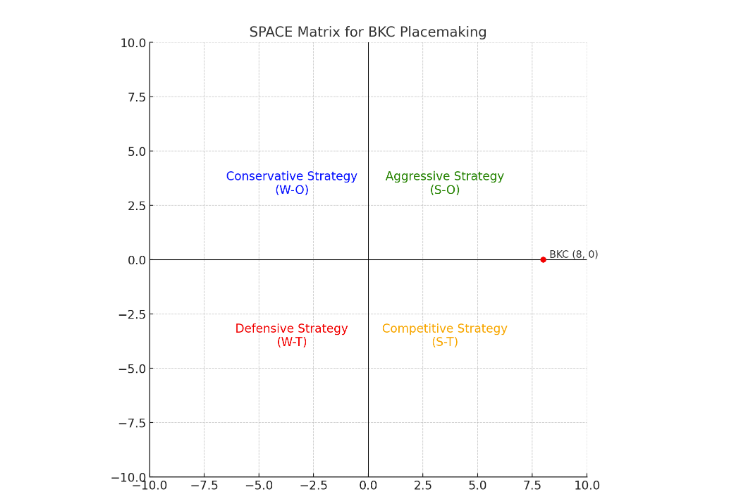

Supplement: Supplementary file 1 [file ba053a906b3b6fe6c1ade152.docx]
